# Supplementary material for: Optimization of standard zircon U–Pb dating: insights into high-temperature thermal annealing
Source: Royal Society of Chemistry journal article supplement (doi:10.1039/d3ja00407d), 2024-01-01
Supplement: d3ja00407d1.pdf [file d3ja00407d1.pdf]

## Supplementary data

**Table S1** Raman spectra ( $\nu_3$ ) for Isochronally (6 h) annealed sample SL-3.

**Table S2** Raman spectra ( $\nu_3$ ) for Isothermally (850°C) annealed sample SL-2.

**Table S3** Raman spectra ( $\nu_3$ ) for unannealed and annealed (1400°C) Plešovice and Qinghu zircons.

**Table S4** Trace element concentrations by LA-ICP-MS for unannealed and annealed Plešovice and  
Qinghu zircons.
