# Supplementary material for: Optimization of standard zircon U–Pb dating: insights into high-temperature thermal annealing
Source: Royal Society of Chemistry journal article supplement (doi:10.1039/d3ja00407d), 2024-01-01
Supplement: d3ja00407d2.xlsx [file d3ja00407d2.xlsx]

## Sheet: Table S1
Table S1 Raman spectra (ν3) for Isochronally (6 h) annealed sample SL-3
T/℃	SL-01		SL-02		SL-03		SL-04		SL-05		SL-06
	FWHM	Raman shift	FWHM	Raman shift	FWHM	Raman shift	FWHM	Raman shift	FWHM	Raman shift	FWHM	Raman shift
	(cm-1)		(cm-1)		(cm-1)		(cm-1)		(cm-1)		(cm-1)
0	4.55801	1005.42	4.90631	1005.33	5.20655	1005.2	5.38181	1005.25	5.434	1005.18	5.50155	1005.13
100	4.56722	1005.39	4.93315	1005.47	5.19391	1005.33	5.40411	1005.38	5.35142	1005.34	5.4977	1005.32
150	4.61378	1005.37	5.02021	1005.34	5.30823	1005.21	5.38377	1005.29	5.48772	1005.22	5.4555	1005.26
200	4.62732	1005.39	4.99162	1005.46	5.29743	1005.3	5.39933	1005.37	5.48533	1005.31	5.54965	1005.29
250	4.58033	1005.61	4.92827	1005.51	5.20476	1005.37	5.36221	1005.36	5.40411	1005.33	5.41727	1005.36
300	4.6384	1005.6	5.03715	1005.55	5.25414	1005.42	5.31304	1005.47	5.47579	1005.4	5.46863	1005.35
350	4.58529	1005.38	4.91241	1005.45	5.2397	1005.28	5.39933	1005.17	5.434	1005.33	5.42444	1005.32
400	4.47728	1005.77	4.87527	1005.35	5.24933	1005.61	5.31304	1005.53	5.40531	1005.71	5.39215	1005.66
450	4.2277	1006.01	4.77209	1005.87	5.06086	1005.78	4.96728	1005.71	5.07298	1005.94	5.02444	1005.87
500	4.11759	1005.95	4.41605	1006.16	4.73347	1005.98	4.82067	1005.66	4.83292	1005.95	4.89165	1005.95
550	4.03282	1006.4	4.24536	1006.35	4.54808	1006.47	4.51204	1006.07	4.66568	1006.38	4.65951	1006.36
600	3.75463	1006.41	4.18348	1006.72	4.33843	1006.59	4.41855	1006.23	4.6348	1006.53	4.51702	1006.49
650	3.60618	1006.85	3.92616	1006.76	4.1569	1006.92	4.29572	1006.34	4.27559	1006.75	4.30452	1006.72
700	3.62448	1007.08	3.84126	1006.96	4.04254	1006.79	4.2441	1006.75	4.13282	1007.11	4.22896	1006.96
750	3.45235	1006.89	3.59702	1006.91	3.93514	1006.88	3.96717	1006.68	3.91075	1007.09	4.06929	1006.83
800	3.41663	1007.24	3.80899	1007.06	3.80899	1007.49	4.07589	1006.94	3.92616	1007.24	4.0017	1007.26
850	3.33562	1006.82	3.58785	1007.2	3.55507	1007.39	3.85673	1007.17	3.7131	1007.25	3.74166	1007.13
900	2.95363	1007.09	3.24746	1007.28	3.36489	1007.31	3.51828	1006.96	3.34494	1007.38	3.40868	1007.3
950	2.81326	1007.52	2.93445	1007.58	3.0287	1007.55	3.226	1007.47	3.10336	1007.53	3.15335	1007.59
1000	2.52916	1007.29	2.74667	1007.6	2.82156	1007.37	2.94542	1007.18	3.00145	1007.61	2.97415	1007.34
1050	2.39957	1007.45	2.29455	1007.77	2.55038	1007.51	2.48375	1007.37	2.47095	1007.71	2.67833	1007.46
1100	1.96881	1007.79	1.88351	1007.92	1.97477	1008	1.85642	1007.76	1.88351	1008.15	1.90903	1007.96
1150	1.96583	1007.93	1.84134	1008.1	1.88952	1008.2	1.79596	1007.92	1.80505	1008.21	2.02529	1008.06
1200	1.90153	1008.32	1.85793	1008.28	1.94494	1008.44	1.97477	1008.13	2.00006	1008.46	2.00155	1008.49
1250	1.8217	1008.19	1.77167	1008.15	1.85642	1008.31	1.85039	1008.1	1.88502	1008.45	1.80505	1008.38
1300	1.81152	1008.2	1.78686	1008.19	1.88051	1008.34	1.85341	1007.99	1.83983	1008.35	1.85539	1008.31

## Sheet: Table S2
Table S2 Raman spectra (ν3) for Isothermally (850℃) annealed sample SL-2
t/h	SL-07		SL-08		SL-09		SL-10		SL-11		SL-12		SL-13		SL-14
	FWHM	Raman shift	FWHM	Raman shift	FWHM	Raman shift	FWHM	Raman shift	FWHM	Raman shift	FWHM	Raman shift	FWHM	Raman shift	FWHM	Raman shift
	(cm-1)		(cm-1)		(cm-1)		(cm-1)		(cm-1)		(cm-1)		(cm-1)		(cm-1)
0	4.93547	1005.38	5.97823	1004.75	3.8378	1006.6	4.15349	1006.07	2.67122	1007.4	5.48651	1004.99	5.22201	1005.22	5.41961	1005.08
0.5	3.52484	1007.12	4.29782	1006.64	2.98814	1007.57	3.26922	1007.34	2.5168	1007.72	4.27868	1006.93	3.91714	1007	3.96845	1006.92
4	3.46994	1007.24	4.0008	1006.9	2.84641	1007.78	3.27045	1007.52	2.53343	1008.12	3.99083	1007.05	3.58695	1007.07	3.71393	1007.05
10	3.33377	1007.29	3.99323	1006.92	2.80715	1007.89	3.14518	1007.68	2.37857	1008.21	3.81471	1007.16	3.44088	1007.27	3.55987	1007.22
25	3.29068	1007.62	3.62639	1007.4	2.77516	1008.09	3.13479	1007.69	2.18072	1008.17	3.6562	1007.3	3.35358	1007.75	3.5242	1007.68
65	3.01185	1007.71	3.39799	1007.54	2.51008	1008.01	2.80177	1007.8	2.15684	1008.1	3.48965	1007.14	3.21122	1007.55	3.28222	1007.42
96	3.0628	1007.58	3.44111	1007.17	2.4643	1007.77	2.8095	1007.49	2.11836	1007.87	3.42888	1007.56	3.22618	1007.44	3.22296	1007.26

## Sheet: Table S3
Table S3 Raman spectra (ν3) for unannealed and annealed (1400℃) Plešovice and Qinghu zircons
QH-unannealed		PLV-unannealed		PLV-annealed		QH-unannealed		QH-annealed
FWHM	Raman shift	FWHM	Raman shift	FWHM	Raman shift	FWHM	Raman shift	FWHM	Raman shift	FWHM	Raman shift
(cm-1)		(cm-1)		(cm-1)		(cm-1)		(cm-1)		(cm-1)
6.59351	1004.46	9.35956	1002.44	2.55886	1008.22	6.59351	1004.46	1.61537	1008.5	3.05726	1007.56
6.08354	1005.29	9.14153	1002.77	2.78279	1007.96	6.08354	1005.29	1.58442	1008.46	2.06818	1008.18
3.64277	1005.81	9.35956	1002.22	2.62928	1008.18	3.64277	1005.81	1.59991	1008.46	2.08293	1008.04
4.42105	1005.58	9.35956	1002.75	2.37377	1008.27	4.42105	1005.58	1.90453	1008.2	2.06818	1008.47
6.00167	1005.14	8.70332	1002.61	2.60116	1008.1	6.00167	1005.14	1.79899	1008.15	2.24385	1008.3
5.49368	1005.29	6.84573	1004.1	2.44531	1008.4	5.49368	1005.29	1.84436	1007.99	1.90453	1008.43
3.43252	1006.74	7.79462	1003.47	2.34503	1008.51	3.43252	1006.74	2.2002	1007.98	2.69929	1008.39
3.27289	1006.78	7.68271	1003.17	2.48802	1008.3	3.27289	1006.78	2.4738	1007.7	2.58707	1008.18
6.17685	1004.57	7.81697	1003.51	2.34503	1008.34	6.17685	1004.57	2.2002	1007.99	2.08293	1008.28
5.82548	1004.33	6.8	1003.36	2.40244	1008.11	5.82548	1004.33	2.15637	1007.86	2.40244	1008.28
9.79366	1002.21	5.76652	1005.19	2.76891	1008.3	9.79366	1002.21	1.5378	1007.64	2.34503	1008.25
7.74988	1002.92	7.02813	1004.75	2.71325	1008.1	7.74988	1002.92	1.85944	1008.05	2.06818	1008.17
5.41009	1006.02	9.35956	1002.84	3.03006	1007.94	5.41009	1006.02	1.75341	1007.97	2.11237	1008.14
4.79246	1006.5	8.79121	1003.5	2.85195	1007.66	4.79246	1006.5	2.09766	1007.83	1.91952	1008.17
4.57041	1005.61	8.39471	1003.39	2.57297	1008.16	4.57041	1005.61	1.67697	1008.1	2.12706	1007.87
5.54132	1005.02	9.03226	1002.66	1.90453	1008.5	5.54132	1005.02	1.5378	1008.2	2.33063	1008
5.63636	1005.63	7.74988	1003.83	2.33063	1008.12	5.63636	1005.63	1.75341	1007.9	2.27285	1008.45
6.77711	1005.07	6.30471	1004.23	2.35941	1008.55	6.77711	1005.07	1.96434	1008.11	2.82433	1008.39
5.49368	1005.23	14.7228	999.5	2.25836	1008.4	5.49368	1005.23	1.85944	1008	2.40244	1008.32
5.82548	1005.5	14.1496	1000	2.37377	1008.04	5.82548	1005.5	1.87449	1008.06	2.38811	1008.4
5.55322	1005.36	14.0348	999.74	2.50222	1008.24	5.55322	1005.36	1.90453	1007.79	2.44531	1008.4
5.32624	1005.4	8.19543	1003.07	2.72718	1008.19	5.32624	1005.4	1.72291	1007.89	2.4	1008.3
6.15355	1004.33	7.93972	1003.1	2.31621	1008.32	6.15355	1004.33	1.69231	1007.92
5.39813	1005.08	12.9349	999.85	2.53057	1008.42	5.39813	1005.08	1.69231	1008.22
6.2234	1004.38	10.4404	1000.8	2.87951	1007.85	6.2234	1004.38	1.69231	1008.16
6.77711	1004.11	10.762	1001.36	2.27285	1008.36	6.77711	1004.11	1.66161	1008.11
5.95479	1005.52	11.9751	1000.88	2.35941	1008.17	5.95479	1005.52	1.73817	1008.1
3.09794	1006.07	12.25	1000.67	2.71325	1008.1	3.09794	1006.07	2.00897	1008.06
8.06217	1003.01	9.9018	1001.86	2.37377	1008.1	8.06217	1003.01	1.91952	1007.91
7.20969	1003.26	9.9882	1001.92			7.20969	1003.26	2.43103	1008.13
7.25496	1002.93	12.6402	1000.55			7.25496	1002.93	2.18561	1008.07
8.20652	1002.67	9.93421	1001.94			8.20652	1002.67	2.27285	1007.97
6.51289	1005.05	9.8153	1002.03			6.51289	1005.05	1.97924	1007.88
7.31148	1004.68	9.77201	1002.27			7.31148	1004.68	2.55886	1008.04
5.8137	1004.17	10.3652	1002.14			5.8137	1004.17	2.2002	1007.8
7.3792	1003.36	10.2792	1001.95			7.3792	1003.36	1.90453	1007.93
6.21177	1004.66	10.7834	1002.33			6.21177	1004.66	2.50222	1008.18
4.8415	1005.52	9.67453	1001.87			4.8415	1005.52	2.22932	1008.22
4.02979	1005.97	10.5155	1002.26			4.02979	1005.97	2.31621	1008.42
6.47828	1004	9.94501	1002.03			6.47828	1004	2.61522	1008.36
6.98261	1003.06					6.98261	1003.06	2.11237	1008.34
5.79012	1004.6					5.79012	1004.6	2.171	1008.19
6.40896	1004.51					6.40896	1004.51	1.79899	1008.27
5.95479	1004.46					5.95479	1004.46	2.00897	1008.31
6.02508	1005.24					6.02508	1005.24	1.97924	1008.36
6.25827	1005.24					6.25827	1005.24	2.55886	1008.18
5.82548	1004.31					5.82548	1004.31	2.22932	1008.24
7.13036	1003.45					7.13036	1003.45	2.24385	1007.91
6.59351	1003.96					6.59351	1003.96	2.30178	1008.15
5.06086	1004.26					5.06086	1004.26	2.09766	1008.06
6.00167	1004.54					6.00167	1004.54	2.12706	1008.29
6.1069	1004.57					6.1069	1004.57	1.99412	1008.38
6.93703	1004.99					6.93703	1004.99	2.28732	1008.25
5.90783	1004.8					5.90783	1004.8	2.171	1008.03
5.87257	1004.75					5.87257	1004.75	1.99412	1008.25
7.4806	1004.3					7.4806	1004.3	2.11237	1008.33
5.44595	1006.18					5.44595	1006.18	1.93448	1008.2
7.5593	1005					7.5593	1005	1.96434	1008.21
6.06017	1004.67					6.06017	1004.67	2.14173	1008.41
un-unannealed; an-annealed; PLV-Plešovice; QH-Qinghu		un-unannealed; an-annealed; PLV-Plešovice; QH-Qinghu

## Sheet: Table S4
Table S4 Trace element concentrations by LA-ICP-MS for unannealed and annealed Plešovice and Qinghu zircons
Spots	Trace element concentration (μg/g)
	P	Ti	Y	Nb	La	Ce	Pr	Nd	Sm	Eu	Gd	Tb	Dy	Ho	Er	Tm	Yb	Lu	Pb	Th	U
un-PLV-01	239.84	64.16	361.54	3.92	0.0097	1.637	0.1071	1.251	2.24	0.643	8.86	3.72	39.06	11.12	37.36	6.45	47.48	5.87	106.76	43.27	501.78
un-PLV-02	253.61	63.67	378.83	4.02	0.016	1.685	0.0916	1.168	2.36	0.681	9.82	3.77	40.83	11.5	39.23	6.79	50.1	6.2	113.42	46.27	531.46
un-PLV-03	270.63	58.06	326.29	4.71	0.0061	1.705	0.0702	0.868	1.92	0.545	7.92	3.24	35.32	10.08	34.49	5.87	42.78	5.39	117.79	48.15	551.52
un-PLV-04	336.71	71.85	458.4	4.43	0.0193	1.905	0.117	1.57	2.85	0.821	11.71	4.6	49.56	13.91	48.87	8.45	64.36	8.01	129.12	56.83	614.79
un-PLV-05	347.26	70.91	456.77	4.31	0.0244	1.884	0.132	1.67	3.06	0.813	11.62	4.63	49.78	14	48.32	8.54	63.36	8.04	127.98	56.17	606.43
un-PLV-06	288.75	70.9	390.36	5.38	0.0166	2.064	0.1161	1.438	2.6	0.728	10.49	4.31	43.66	12.1	41.16	6.93	52.59	6.18	135.32	67.6	644.53
un-PLV-07	275.96	62.67	349.91	4.51	0.0206	1.874	0.0886	1.258	2.26	0.687	8.91	3.59	37.81	10.89	37.19	6.54	48.59	6.13	116.66	52.58	557.37
un-PLV-08	233.72	37.96	258.67	3.16	0.0202	1.768	0.0819	0.982	1.68	0.469	6.12	2.514	27.15	7.78	27.99	5.05	38.75	4.96	92.16	37.88	434.74
un-PLV-09	319.49	67.19	368.95	5.03	0.0387	2.161	0.13	1.64	2.46	0.625	9.61	3.76	40.33	11.44	39.57	7.04	52.56	6.54	139.29	61.24	661.09
un-PLV-10	360.7	62.2	433.06	6.13	0.0459	2.439	0.125	1.79	2.93	0.85	11.79	4.6	48.66	13.39	45.51	7.92	57.91	7.22	183.65	86.02	862.03
un-PLV-11	270.38	72.06	242.17	4.27	0.0316	1.742	0.116	1.107	1.76	0.427	6.22	2.439	26.05	7.48	25.74	4.67	34.44	4.34	104.57	43.05	500.06
un-PLV-12	216.2	30.58	204.05	2.9	0.0146	1.558	0.0791	0.999	1.43	0.346	4.97	2.077	21.6	6.21	21.47	3.88	29.42	3.72	85.52	34.96	400.62
un-PLV-13	224.76	38.05	195.46	3.14	0.0126	1.388	0.0585	0.76	1.38	0.341	4.83	1.92	20.6	5.98	20.68	3.63	27.81	3.41	87.07	34.25	414.23
un-PLV-14	336.87	60.28	359.09	4.79	0.0161	1.934	0.0897	1.245	2.2	0.63	8.96	3.63	38.98	11.24	39.04	7.03	51.89	6.61	147.98	59.4	705.28
un-PLV-15	313.4	63.58	370.75	4.85	0.008	1.964	0.0864	1.302	2.49	0.68	9.47	3.75	40.57	11.55	40.48	7.18	54.8	7.02	130.29	57.71	624.78
un-PLV-16	379.3	68.41	438.68	5.78	0.0147	2.322	0.1065	1.63	2.83	0.753	10.71	4.54	47.94	13.9	47.73	8.36	63.45	7.98	181.3	76.27	877.09
un-PLV-17	345.61	60.06	376.66	5.11	0.0104	2.029	0.0907	1.394	2.38	0.651	9.13	3.68	40.64	11.83	40.82	7.28	54.59	6.84	159.01	66.56	766.88
un-PLV-18	<72.2	103.63	723.37	11.35	0.0172	4.23	0.203	2.97	5.05	1.317	19.94	7.9	84.49	23.74	81.13	13.9	102.1	12.48	368.46	174.4	1822.06
un-PLV-19	374.68	67.5	420.63	6.3	0.0165	2.292	0.11	1.334	2.64	0.753	10.78	4.39	46.77	13.64	46.51	8.2	63.04	7.69	182.37	76.66	886.47
un-PLV-20	386.86	68.04	424.11	6.33	0.0086	2.255	0.0945	1.47	2.65	0.756	10.23	4.28	46.83	13.31	46.19	8.11	61.36	7.6	187.08	77.05	891.64
un-PLV-21	600.74	92.86	708.4	4.81	0.0264	2.46	0.231	3.03	4.87	1.434	18.4	7.39	77.35	21.79	76.05	13.47	102.09	12.84	168	83.5	818.04
un-PLV-22	630.55	94.36	731.14	4.89	0.153	2.73	0.234	3.05	5.4	1.356	19.1	7.59	78.49	22.07	76.98	13.72	104.25	13.14	171.82	85.18	822.43
un-PLV-23	603.79	95.01	689.05	4.88	0.199	2.94	0.309	3.21	5.18	1.36	18.32	7.12	74.74	21.29	73.15	12.75	97.65	12.22	166.19	90.31	789.87
un-PLV-24	591.36	93.4	681.93	4.89	0.032	2.38	0.212	2.75	5.1	1.331	18.03	7.06	73.41	20.79	71.43	12.48	94.02	11.9	163.8	80.37	775.84
un-PLV-25	593.89	92.03	701.67	4.77	0.0322	2.37	0.207	2.76	4.75	1.34	17.83	7.13	75.97	21.02	72.72	12.97	98.35	12.36	162.46	79.82	782.62
un-PLV-26	601.03	93.92	700.38	4.85	0.123	2.99	0.347	3.63	5.12	1.358	18.45	7.21	75.07	21	73.5	12.71	96.76	12.47	162.77	95.02	772.73
un-PLV-27	593.7	94.13	698.64	4.9	0.0353	2.39	0.208	2.74	4.99	1.29	18.33	7.12	74.81	21.36	73.05	12.83	96.76	12.39	164.6	80.1	784.29
un-PLV-28	579.2	94.03	688.33	4.83	0.0341	2.43	0.219	2.9	4.65	1.285	18.39	6.95	74	20.9	72.06	12.74	96.14	12.27	163.99	78.27	772.55
an-PLV-01	373.49	65.8	502	4.4	0.0598	2.147	0.168	2.13	3.19	0.887	12.8	5.15	54.58	15.54	53.36	9.3	70.07	8.86	134.57	60.6	655.51
an-PLV-02	415.6	65.59	540.51	4.55	0.029	2.281	0.17	2.02	3.91	0.985	14.11	5.46	58.91	16.72	57.42	10.14	75.42	9.36	143.03	66.2	689.68
an-PLV-03	364.45	71.12	496.05	4.49	0.0214	2.07	0.134	1.89	3.14	0.872	12.78	5	53.03	15.42	52.81	9.45	70.09	8.76	133.56	60.12	656.57
an-PLV-04	391.25	73.56	518.81	4.53	0.0266	2.082	0.135	2.06	3.29	0.982	13.06	5.36	56.24	16.05	55.28	9.73	72.68	9.21	137.11	62.41	671.31
an-PLV-05	376.78	72.66	505.88	4.45	0.0203	2.037	0.144	2.01	3.4	0.925	13.35	5.19	55.88	15.59	53.9	9.36	72.17	8.95	137.01	61.94	669.05
an-PLV-06	298.33	61.25	414.8	3.92	0.128	2.15	0.152	1.68	2.64	0.718	10.36	4.09	44.58	13.08	45.42	8.13	62.63	7.91	114.76	51.06	556.93
an-PLV-07	278.98	53.01	386.83	3.69	0.0249	1.884	0.124	1.44	2.19	0.737	9.43	3.94	41.81	11.74	42.01	7.47	55.55	6.99	110.46	48.89	537.26
an-PLV-08	348.05	62.61	458.65	4.09	0.0237	1.917	0.148	1.59	3.07	0.842	11.78	4.74	50.76	14.19	48.79	8.62	64.39	8.24	124.91	55.96	607.16
an-PLV-09	473.84	102.07	620.37	10.78	0.0184	3.66	0.18	2.34	4.64	1.222	17.34	6.53	70.11	19.7	65.89	11.08	81.61	9.89	342.06	167.32	1663.61
an-PLV-10	470.88	96.42	620.8	10.79	0.0281	3.61	0.181	2.46	4.58	1.183	16.69	6.58	70.1	19.57	66.32	11.18	81.94	9.81	337.7	166.4	1658.28
an-PLV-11	466.82	96.93	614.41	10.25	0.0369	3.67	0.201	2.57	4.3	1.218	16.79	6.57	69.39	19.19	64.12	10.93	79.1	9.64	328.78	163.33	1619.4
an-PLV-12	501.74	109.96	709.47	13.32	0.0578	4.43	0.251	3.21	5.39	1.416	20.11	7.82	80.86	22.06	72.66	12.32	87.6	10.58	379.46	206.99	1858.48
an-PLV-13	486.82	107.7	677.8	12.48	0.084	4.66	0.256	3.29	5.38	1.456	18.8	7.32	78.15	21.69	71.29	11.97	85.75	10.66	357.78	191	1741.78
an-PLV-14	326.32	60.99	343.9	4.9	0.0071	1.937	0.0806	1.13	2.21	0.576	8	3.48	37.76	10.96	37.07	6.7	49.2	6.32	147.48	62.29	726.01
an-PLV-15	314.94	67.16	326.35	4.81	0.699	8.81	0.434	3.01	2.6	0.872	8.58	3.3	35.2	10.16	35.51	6.21	46.45	5.88	134.54	89.64	652.95
an-PLV-16	373.94	75.5	426.08	6.11	0.342	5.36	0.289	2.42	3.1	0.892	10.99	4.4	46.65	13.22	45.54	7.79	58.5	7.38	192.1	98.57	934.75
an-PLV-17	393.1	71.89	447.19	6.82	0.0576	2.89	0.173	1.79	3.11	0.899	11.54	4.62	49.66	13.94	47.54	8.04	60.19	7.51	213.62	101.47	1035.06
an-PLV-18	314.93	76.34	442.22	5.65	0.01	2.346	0.139	2.03	3.56	0.907	13.2	5.05	50.97	13.89	46.84	8.11	60.72	7.55	144.99	82.89	711.99
an-PLV-19	311.8	78.12	439.94	5.74	0.0203	2.242	0.14	2.05	3.39	0.909	13.01	4.84	50.52	13.84	46.38	8.08	60.8	7.63	144.09	80.57	709.18
an-PLV-20	312.86	77.96	435.5	5.6	0.0182	2.277	0.129	1.69	3.25	0.893	12.8	4.82	49.3	13.58	46.03	7.86	58.32	7.39	143.94	79.42	695.09
an-PLV-21	319.46	74.66	447.63	5.87	0.0218	2.343	0.141	2.03	3.37	0.947	13.49	4.96	51.29	13.98	47.16	8.21	62.13	7.86	145.01	83.03	717.49
an-PLV-22	312.01	75.59	443.02	5.73	0.0189	2.377	0.159	2.08	3.65	0.98	13.38	4.94	51.42	14	47.01	8.06	59.84	7.68	144.9	82.61	717.42
an-PLV-23	379.16	80.74	436.96	6.43	0.0074	2.392	0.124	1.47	2.74	0.77	11.27	4.39	47.71	13.63	47.24	8.2	61.11	7.54	199.49	86.43	982.81
an-PLV-24	383.07	79.69	431.84	6.5	0.0155	2.47	0.105	1.42	2.69	0.717	10.95	4.3	47.22	13.41	45.68	8.06	59.36	7.23	200.67	87.17	974.2
an-PLV-25	312.41	73.49	435.36	5.65	0.0153	2.247	0.122	1.89	3.31	0.887	12.72	4.92	50.53	13.65	45.43	7.99	58.4	7.28	145.18	80.92	708.12
an-PLV-26	313.8	76.04	434.67	5.69	0.0207	2.232	0.13	1.92	3.32	0.943	12.68	4.91	50.05	13.7	46.25	7.98	59.94	7.73	144.95	78.91	702.81
un-QH-01	128.04	9.48	754.89	3.85	0.0147	9.58	0.0934	1.57	3.09	0.553	15.58	5.69	67.43	24.49	110.75	25.18	252.58	44.26	65.46	333.27	654.48
un-QH-02	270.5	16.76	1425.75	13.73	0.065	32.49	0.127	2.32	5.07	0.603	25.67	9.64	119.62	45.69	210.48	48.19	492.28	87.03	201.69	943.36	2015
un-QH-03	143.16	9.79	629.17	6.75	0.0576	14.16	0.0934	1.225	2.21	0.253	11.8	4.49	53.39	20.02	93.3	21.61	220.68	39.12	100.42	506.63	1034.05
un-QH-04	123.42	7.61	580.26	5.9	0.0095	14.47	0.054	0.83	1.91	0.252	9.94	3.97	47.63	18.55	85.98	20.06	204.67	36.63	88.86	379.98	900.43
un-QH-05	268.08	8.44	1071.54	3.48	4.6	20.72	0.987	5.5	5.13	0.723	22.63	8.09	92.14	33.28	149.02	32.9	321.87	55.99	79.9	471.16	805.91
un-QH-06	191.45	13.39	707.2	4.61	0.021	10.17	0.115	1.82	3.23	0.378	15.07	5.4	62.89	22.93	102.8	23.21	231.32	40.84	66.33	364.59	682.33
un-QH-07	81.78	9.02	619.61	3	0.189	9.19	0.232	2.33	3.35	0.895	15.48	5.09	57.06	20.2	87.52	19.35	191.48	32.84	44.43	262.95	448.4
un-QH-08	149.55	8.05	676.74	6.43	0.007	16.18	0.0724	1.333	2.36	0.313	12.61	4.71	56.66	21.48	99.07	22.76	233.9	41.89	102.12	470.88	1046.77
un-QH-09	258.44	7.19	591	5.39	0.0203	12.73	0.0506	0.738	1.71	0.24	10.06	3.98	48.32	18.48	87.85	20.83	212.39	37.66	83.54	336.18	855.16
un-QH-10	126.67	11.98	543	3.64	0.809	9.15	0.217	1.73	2.48	0.368	11.97	4.31	48.54	17.46	77.74	17.77	173.94	30.93	43.3	239.56	424.31
un-QH-11	126.7	7.26	688.83	6.21	0.0601	14.32	0.135	1.66	2.92	0.401	12.95	4.83	56.99	21.48	98.44	22.8	230.87	40.36	84.38	396.56	825.75
un-QH-12	426.09	7.92	713.98	6.65	0.0368	16.01	0.0808	1.353	2.44	0.284	12.66	4.96	60.42	22.95	105.98	24.45	249.34	44.46	114.36	554.04	1172.61
un-QH-13	132.96	8.11	593.44	6.06	0.0062	14.61	0.0607	0.959	2	0.262	10.83	4.07	49.79	18.74	87.34	20.57	209.89	37.27	93.26	405.02	951.25
un-QH-14	135.15	8.11	752.02	5.32	0.099	14.15	0.114	1.404	2.75	0.431	13.46	5.13	62.54	24.04	110.33	25.53	256.83	46.05	87.75	388.51	862.58
un-QH-15	139.82	10.06	678.37	5.42	0.0086	15.23	0.0796	1.18	2.59	0.42	12.32	4.71	55.79	21.51	98.91	22.62	226.47	40.09	96.61	484.99	980.5
un-QH-16	207.25	21.72	1008.97	5.51	2.97	18.67	0.616	4.08	4.57	0.667	21.13	7.47	86.52	31.37	139.35	30.85	307.86	52.98	94.72	516.76	935.49
un-QH-17	142.72	7.95	704.75	6.77	0.0089	17.75	0.0735	1.255	2.5	0.34	12.86	4.76	58.39	22.19	102.53	23.79	241.55	42.5	105.62	469.11	1067.58
un-QH-18	113.54	10.11	836.34	3.38	0.131	9.78	0.173	2.26	3.79	0.633	18.03	6.27	73.59	26.54	119.35	26.86	261.66	46.31	65.84	357.53	647.73
un-QH-19	127.74	9.42	595.48	4.54	0.0097	10.1	0.0683	1.278	2.27	0.367	11.45	4.17	49.92	19	87.55	20.07	206.25	36.72	72	348.95	726.71
un-QH-20	121.51	10.67	533.83	3.99	0.103	8.8	0.0816	1.127	1.99	0.354	9.93	3.78	45.63	16.97	77.22	18.01	184.05	32.64	56.97	261.55	562.99
un-QH-21	139.13	11.36	964.05	4.05	0.093	10.23	0.193	3.09	4.84	0.55	21.64	7.5	85.83	30.98	134.86	30.06	293.3	50.5	74.9	442.46	734.89
un-QH-22	805.75	8.32	732.88	6.29	0.083	17.93	0.0909	1.207	2.24	0.338	12.68	4.8	59.67	22.88	107.47	25.01	250.4	46.13	105.84	453.57	1069.3
un-QH-23	136.89	8.3	740.51	4.44	0.0082	10.17	0.0964	1.46	3.13	0.407	14.63	5.33	64.75	23.82	109.17	24.77	249.51	43.85	76.46	368.92	751.73
un-QH-24	136.65	8.06	676.62	6.52	0.0278	13.79	0.0755	1.181	2.27	0.309	12.48	4.51	57.24	21.21	99.65	23.1	233.18	41.41	89.05	394.67	905.84
un-QH-25	261.62	15.98	888.5	1.878	0.0324	7.28	0.275	4.51	6.28	1.37	23.43	7.77	84.15	29.19	123.71	26.31	250.66	43.09	34.12	248.88	351.1
un-QH-26	389.75	9.48	1186.75	4.44	0.0798	13.01	0.21	3.04	5.61	0.759	25.68	9.05	102.41	37.23	166.35	36.57	358.51	61.79	94.67	569.47	977.78
un-QH-27	128.06	10.13	1250.91	3.85	0.0319	11.52	0.275	3.96	6.16	0.892	27.57	9.65	111.34	39.96	175.58	38.22	373.03	64.53	90.1	573.25	915.06
un-QH-28	145.75	7.93	691.52	6.6	0.0148	16.9	0.0663	1.255	2.58	0.331	12.57	4.75	57.41	21.78	100.88	23.39	237.8	42.4	110.85	500.27	1106.36
an-QH-01	152.06	20.11	1093.03	4.73	1.302	14.55	0.409	3.87	5.57	0.634	24.43	8.63	96.89	34.7	149.76	33.14	324.48	55.41	82.87	535.09	859.51
an-QH-02	168.47	9.89	667.34	6.28	0.629	17.59	0.214	1.66	2.37	0.321	11.69	4.53	55.28	21.03	96.27	22.53	231.06	40.52	100.15	427.34	1029.81
an-QH-03	122.25	10.62	951.63	3.91	0.0107	10.23	0.131	2.56	4.64	0.671	20.39	7.12	82.72	29.82	132.96	29.77	291.16	50.75	70.42	411.5	742.48
an-QH-04	145.83	14.68	758.87	5.15	0.0579	12.01	0.101	1.54	2.96	0.34	15	5.53	66.65	24.52	112.96	25.45	255.09	44.48	82.17	422.1	856.8
an-QH-05	903.83	59.29	544.13	4.15	0.094	8.89	0.099	1.37	2.17	0.303	10.77	3.9	46.94	17.31	80.76	18.21	182.54	33.97	52.76	294.67	548.33
an-QH-06	115.9	11.21	1061.64	3.66	0.0237	10.91	0.139	2.33	4.63	0.699	22.44	8.11	92.64	33.58	150.05	32.79	323.96	55.58	78.5	474.87	811.07
an-QH-07	247.41	13.37	826.54	4.78	0.264	13.57	0.207	2.23	3.83	0.748	17.1	6.15	72.92	26.64	118.66	26.34	268.86	46.91	78.5	442.6	831.46
an-QH-08	148.3	13.77	632.92	5.98	0.318	13.96	0.137	1.388	2.37	0.296	12.33	4.53	53.49	20.51	93.82	21.86	223.35	39.35	95.48	467.39	985.01
an-QH-09	152.3	6.12	631.86	7.63	0.0118	17.02	0.0394	0.931	1.93	0.225	10.68	4.14	52.29	20.12	95.91	22.52	233.06	41.27	120.46	455.73	1267.27
an-QH-10	145.95	7.54	703.93	7.56	0.161	17.88	0.0888	1.159	2.49	0.265	12.5	4.88	59.85	22.45	104.54	24.26	247.53	43.79	117.57	540.84	1234.75
an-QH-11	179.59	27.12	1017.37	6.23	0.315	16.75	0.177	2.47	4.21	0.589	21.3	7.6	88.62	32.01	144.51	32.51	319.06	55.52	113.23	707.37	1182.51
an-QH-12	136.99	9.87	636.37	5.75	0.022	12.05	0.0889	1.238	2.23	0.328	12.03	4.45	53.58	20.36	94.29	22.3	228.35	41.03	89.02	413.79	917.29
an-QH-13	134.32	9.52	565.2	5.28	0.0099	12.36	0.0553	0.927	2.08	0.275	10.37	3.84	48.45	18.16	83.75	19.65	199.01	35.74	86.49	414.87	906.7
an-QH-14	384.16	11.44	559.32	5.22	0.0207	10.82	0.0639	1.08	2.17	0.225	10.21	3.84	46.92	17.87	81.97	19.26	194.78	34.53	70.13	336.87	725.03
an-QH-15	165.97	110.47	930.26	3.91	3.71	17	0.884	4.63	4.43	0.62	20.77	7.31	84.24	30.44	132.77	29.48	292.19	50.44	67.1	400.6	679.01
an-QH-16	643.37	38.75	1120.49	5.67	0.118	14.65	0.194	2.76	4.97	0.693	22.99	8.28	95.18	34.48	155.55	34.82	342.77	60.48	90.68	555.89	958.7
an-QH-17	351.88	6.97	748.64	7.06	0.0116	15.82	0.0612	1.095	2.59	0.311	13.48	5.27	64.44	23.99	112.21	26.14	265.74	46.79	119.5	514.87	1234.26
an-QH-18	2093.47	274.19	1277.12	9.42	2.332	25.11	0.628	4.45	5.46	0.724	26.19	9.26	108.35	40.35	185.16	41.04	401.78	74.83	142.15	771.02	1461.15
an-QH-19	444.77	15.98	874.41	3.15	4.83	17.88	1.001	5.62	4.78	0.64	19.54	6.73	78.69	28.46	125.67	27.86	272.97	47.65	60.4	354.23	629.98
an-QH-20	136.92	32.7	1392.89	5.76	0.727	14.4	0.351	4.31	7.13	0.866	32.8	11.29	125.72	44.76	194.81	42.71	412.22	71.13	114.13	782.15	1192.23
an-QH-21	157.73	9.93	709.55	5.31	0.0107	13.23	0.0693	1.304	2.62	0.35	12.99	4.99	59.89	22.44	104.03	23.89	243.59	42.56	85.12	421.31	869.71
an-QH-22	145.05	9.76	611.33	5.78	0.0695	12.65	0.0795	1.207	2.22	0.338	11.26	4.37	52.32	19.46	90.29	20.8	212.79	37.82	89.05	436.29	922.26
an-QH-23	135.06	15.22	626.12	4.92	0.386	11.89	0.153	1.48	2.34	0.305	11.63	4.43	52.53	19.78	92.17	21.32	218.52	38.98	72.05	331.07	720.84
an-QH-24	140.85	9.55	659.97	6.03	0.0104	13.71	0.0669	1.145	2.36	0.327	12.17	4.67	55.84	21.07	96.74	22.74	230.27	40.2	99.3	493.85	1022.51
un-unannealed; an-annealed; PLV-Plešovice; QH-Qinghu
